# Supplementary material
Source: PubMed Central journal article supplement (PMC7173145)
Supplement: mmc1.pdf [file mmc1.pdf]

| Treatment                 | HeLa cell viability (%mean of control cells $\pm$ S.E.M) | Huh7 cell viability (%mean of control cells $\pm$ S.E.M) |
|---------------------------|----------------------------------------------------------|----------------------------------------------------------|
| Arf1 siRNA                | 106.6 $\pm$ 2.7                                          | ND*                                                      |
| GBF1 siRNA                | 118.5 $\pm$ 3.9                                          | ND*                                                      |
| PI4KIII $\beta$ siRNA     | 115.0 $\pm$ 4.5                                          | 98.5 $\pm$ 2.5                                           |
| PI4KIII $\beta$ -KD       | 105.7 $\pm$ 10.6                                         | 103.3 $\pm$ 1.4                                          |
| Sac1                      | 102.8 $\pm$ 12.4;                                        | 97.3 $\pm$ 1.9                                           |
| PI4KIII $\beta$ KD + Sac1 | 114.4 $\pm$ 10.0                                         | 101.4 $\pm$ 1.6                                          |
| PIK93 (500nM)             | 102.8 $\pm$ 3.1                                          | 92.3 $\pm$ 1.7                                           |
| Sar1[T39N]                | 115.1 $\pm$ 9.5.                                         | ND*                                                      |

**\*ND: not determined**

**Table S1. Related to Figures 1 and 5.** A summary of cell viability under various siRNA treatment and transient plasmid expression conditions. Cell viability measured by Celltiter glo viability assays.
